# Supplementary material for: Re-Rolling Treatment in the Fermentation Process Improves the Aroma Quality of Black Tea
Source: MDPI journal article supplement (doi:10.3390/foods12193702), 2023-10-09
Supplement: s1 [file s1]

# Re-Rolling Treatment in the Fermentation Process Improves the Aroma Quality of Black Tea

Qincao Chen <sup>1,†</sup>, Penghui Yu <sup>2,†</sup>, Ziyi Li <sup>1</sup>, Yuhang Wang <sup>1</sup>, Yafang Liu <sup>1</sup>, Yin Zhu <sup>3,\*</sup> and Haihui Fu <sup>1,\*</sup>

<sup>1</sup> College of Agriculture, Jiangxi Agricultural University, No. 1101 Zhimin Avenue, Nanchang 330045, China; chenqincao@jxau.edu.cn (Q.C.); 18931077210@163.com (Z.L.); carti18942330763@163.com (Y.W.); lyf2805101190@163.com (Y.L.)

<sup>2</sup> Tea Research Institute, Hunan Academy of Agricultural Sciences, No. 702 Yuanda 2nd Road, Changsha 410125, China; hncys-yupenghui@hunaas.cn

<sup>3</sup> Tea Research Institute, Chinese Academy of Agricultural Sciences, No. 9 Meiling South Road, Hangzhou 310008, China

\* Correspondence: zhuy\_scu@tricaas.com (Y.Z.); fuhh@jxau.edu.cn (H.F.)

† These authors contributed equally to this work.

**Table S1.** Identified volatile compounds and their peak areas in different black tea samples

| NO.                          | Peak                                   | CAS        | Tested RI | Referred RI | Category | R1              | R1.5             | RR1.5           | P-value |
|------------------------------|----------------------------------------|------------|-----------|-------------|----------|-----------------|------------------|-----------------|---------|
| <b>Alkanes</b>               |                                        |            |           |             |          |                 |                  |                 |         |
| 1                            | Dodecane                               | 112-40-3   | 1199      | 1200        |          | 571422±72491a   | 516537±55944a    | 332790±21159b   | 0.004   |
| 2                            | Farnesane                              | 3891-98-3  | 1399      | 1379        |          | 152825±13802a   | 129088±11247a    | 121800±24703a   | 0.158   |
| <b>aromatic hydrocarbons</b> |                                        |            |           |             |          |                 |                  |                 |         |
| 3                            | Toluene                                | 108-88-3   | 750       | 759         |          | 2816410±429419a | 10756413±270611b | 6099123±891908c | 0.000   |
| 4                            | m-Xylene                               | 108-38-3   | 854       | 862         |          | 699665±198166a  | 1666336±152076b  | 687241±37142a   | 0.000   |
| 5                            | p-Xylene                               | 106-42-3   | 861       | 866         |          | 682294±517206a  | 1552080±136006b  | 648676±64647a   | 0.020   |
| 6                            | o-Xylene                               | 95-47-6    | 886       | 889         |          | 1484518±939061a | 3271697±271018b  | 1616801±80602a  | 0.015   |
| 7                            | Cumene                                 | 98-82-8    | 920       | 914         |          | 698399±502369a  | 901719±351893a   | 441779±64034a   | 0.350   |
| 8                            | o-Cymene                               | 527-84-4   | 1022      | 1021        |          | 6233602±56916a  | 6134748±514593a  | 5928498±191541a | 0.526   |
| 9                            | m-Cymenene                             | 1124-20-5  | 1087      | 1084        |          | 353720±4521a    | 347624±33323a    | 311105±12002a   | 0.088   |
| 10                           | 1,2,4,5-Tetramethylbenzene             | 95-93-2    | 1116      | 1131        |          | 126973±2903a    | 226179±32283b    | 114747±1107a    | 0.001   |
| 11                           | 2-Methylnaphthalene                    | 91-57-6    | 1285      | 1299        |          | 11646±1261a     | 10763±524a       | 8640±210b       | 0.009   |
| 12                           | 1,1,6-Trimethyl-1,2-dihydronaphthalene | 30364-38-6 | 1348      | 1355        |          | 7303±1846a      | 8211±2935a       | 7927±832a       | 0.862   |
| 13                           | Butylated Hydroxytoluene               | 128-37-0   | 1511      | 1517        |          | 74164±7684a     | 60618±9366ab     | 53082±2926b     | 0.030   |
| 14                           | Cadalin                                | 483-78-3   | 1672      | 1675        |          | 7109±2552a      | 8172±630a        | 8181±719a       | 0.652   |
| <b>Alkenes</b>               |                                        |            |           |             |          |                 |                  |                 |         |
| 15                           | 4-Methyl-1,3-pentadiene                | 926-56-7   | 596       | 609         |          | 90208±86270a    | 27340±6647a      | 87358±30493a    | 0.329   |
| 16                           | 2,6-Dimethyl-1,5-heptadiene            | 6709-39-3  | 882       | 882         |          | 45968±2364a     | 50456±2200ab     | 54445±3533b     | 0.026   |
| 17                           | Isocitronellene                        | 85006-04-8 | 914       | 926         | VT       | 123238±15707a   | 79885±5668b      | 94438±6696b     | 0.006   |
| 18                           | 3,5,5-Trimethyl-2-hexene               | 26456-76-8 | 973       | 985         |          | 273924±14054a   | 263045±43970a    | 301577±46951a   | 0.485   |
| 19                           | 4-Carene                               | 29050-33-7 | 988       | 1009        | VT       | 25681±2414a     | 32874±977b       | 31415±245b      | 0.003   |
| 20                           | α-Fellandrene                          | 99-83-2    | 1001      | 1000        | VT       | 1155623±45991a  | 1254071±140773a  | 1295110±71172a  | 0.258   |
| 21                           | α-Terpinene                            | 99-86-5    | 1013      | 1003        | VT       | 90403±3963a     | 104406±13523a    | 108061±8336a    | 0.130   |
| 22                           | γ-Terpinene                            | 99-85-4    | 1015      | 1030        | VT       | 94351±25955a    | 66720±10220a     | 68117±23794a    | 0.273   |
| 23                           | Limonene                               | 138-86-3   | 1025      | 1030        | VT       | 6015561±338482a | 6653925±782289a  | 6824900±54493a  | 0.187   |

|                 |                              |            |      |      |        |                   |                  |                 |       |
|-----------------|------------------------------|------------|------|------|--------|-------------------|------------------|-----------------|-------|
| 24              | 5-Ethyl-1-formylcyclopentene | 36431-60-4 | 1028 | 1026 |        | 149667±7057a      | 135392±10480ab   | 123917±7423b    | 0.027 |
| 25              | (E)- $\beta$ -Ocimene        | 3779-61-1  | 1039 | 1040 | VT     | 264748±14290a     | 324590±41659ab   | 333873±14917b   | 0.039 |
| 26              | $\beta$ -Ocimene             | 13877-91-3 | 1048 | 1046 | VT     | 2471437±203674a   | 2933632±454402a  | 3088188±64831a  | 0.091 |
| 27              | Terpinolene                  | 586-62-9   | 1085 | 1088 | VT     | 503357±14271a     | 536388±64080a    | 535063±22311a   | 0.553 |
| 28              | 4,8-Dimethyl-1,3,7-nonadiene | 19945-61-0 | 1117 | 1117 |        | 138444±5321a      | 154689±9361a     | 180711±16518b   | 0.011 |
| 29              | 1,3,8-p-Menthatriene         | 18368-95-1 | 1121 | 1119 | VT     | 71978±4575a       | 81911±6425a      | 83192±3732a     | 0.065 |
| 30              | allo-Ocimene                 | 7216-56-0  | 1129 | 1131 | VT     | 275826±9813a      | 320363±26641b    | 322809±13332b   | 0.033 |
| 31              | (4E,6E)-Allocimene           | 3016-19-1  | 1140 | 1131 | VT     | 199404±24486a     | 231433±36347a    | 243094±9537a    | 0.182 |
| 32              | $\alpha$ -Terpineol          | 10482-56-1 | 1188 | 1187 | VT     | 488758±26545a     | 488022±54704a    | 466501±33293a   | 0.752 |
| 33              | $\alpha$ -Cubebene           | 17699-14-8 | 1347 | 1351 | VT     | 106810±9320a      | 113392±10121a    | 129116±7193a    | 0.055 |
| 34              | cis- $\beta$ -Farnesene      | 28973-97-9 | 1415 | 1428 | VT     | 55570±1849a       | 60934±17586a     | 61038±6868a     | 0.790 |
| 35              | Humulene                     | 6753-98-6  | 1449 | 1452 | VT     | 108653±4588a      | 121781±28889a    | 126050±3393a    | 0.472 |
| 36              | $\beta$ -Farnesene*          | 77129-48-7 | 1456 | 1455 | VT     | 36568±1077a       | 45829±2512a      | 56132±7162b     | 0.005 |
| 37              | Germacrene D                 | 23986-74-5 | 1473 | 1480 | VT     | 13314±3069a       | 16268±2590a      | 16145±4061a     | 0.504 |
| 38              | $\alpha$ -Muurolene          | 10208-80-7 | 1497 | 1497 | VT     | 65453±1218a       | 71938±5776ab     | 74723±1870b     | 0.047 |
| 39              | $\alpha$ -Farnesene          | 502-61-4   | 1507 | 1505 | VT/CDV | 23833±2092a       | 22426±3778a      | 25286±2003a     | 0.487 |
| 40              | Calamenene                   | 483-77-2   | 1520 | 1527 | VT     | 874274±44186a     | 968173±58264a    | 981115±30230a   | 0.055 |
| 41              | $\delta$ -Cadinene           | 483-76-1   | 1521 | 1524 | VT     | 300089±12849a     | 342430±32581ab   | 362303±12535b   | 0.031 |
| 42              | Cubenene                     | 29837-12-5 | 1529 | 1513 | VT     | 21586±1177ab      | 18042±1942a      | 22318±1590b     | 0.036 |
| 43              | $\alpha$ -Calacorene         | 21391-99-1 | 1540 | 1542 | VT     | 12719±705a        | 11706±1492a      | 13939±1731a     | 0.220 |
| 44              | Neophytadiene                | 504-96-1   | 1842 | 1838 | VT     | 7740±1521a        | 7954±1228a       | 9606±2028a      | 0.369 |
| <b>Alcohols</b> |                              |            |      |      |        |                   |                  |                 |       |
| 45              | 3-Methyl-1-butanol           | 123-51-3   | 720  | 726  | AADV   | 57719±9406a       | 43794±3609a      | 21433±6936b     | 0.002 |
| 46              | 1-Pentanol                   | 71-41-0    | 753  | 763  | FADV   | 1490178±270186a   | 1588054±111403a  | 1280679±162469a | 0.218 |
| 47              | (Z)-2-pentanol               | 1576-95-0  | 760  | 769  | FADV   | 2114798±477328a   | 1772285±131585ab | 1169151±198488b | 0.025 |
| 48              | (Z)-3-Hexenol*               | 928-96-1   | 852  | 851  | FADV   | 11115041±1864685a | 8145185±944450b  | 6195826±616019b | 0.009 |
| 49              | (E)-2-Hexenol                | 928-95-0   | 863  | 852  | FADV   | 1830113±660838a   | 1251113±349826a  | 999029±129982a  | 0.136 |
| 50              | 1-Hexanol*                   | 111-27-3   | 866  | 865  | FADV   | 9765593±247595a   | 5994946±371294b  | 4794893±315483c | 0.000 |

|                  |                                  |            |      |      |      |                   |                    |                   |       |
|------------------|----------------------------------|------------|------|------|------|-------------------|--------------------|-------------------|-------|
| 51               | Linalool-3,7-oxide               | 7392-19-0  | 969  | 971  | VT   | 110312±9670a      | 115730±16036a      | 115716±6114a      | 0.804 |
| 52               | 1-Heptanol                       | 111-70-6   | 971  | 967  | FADV | 896333±50030a     | 907862±87858a      | 892328±58942a     | 0.958 |
| 53               | 1-Octen-3-ol*                    | 3391-86-4  | 979  | 986  | FADV | 4241123±233661a   | 5071255±306378b    | 5165420±340258b   | 0.016 |
| 54               | cis-Anhydrolinalool              | 54750-69-5 | 1005 | 1007 | VT   | 53372±4269a       | 53793±11191a       | 57570±3529a       | 0.746 |
| 55               | 2-Ethyl-1-hexanol                | 104-76-7   | 1030 | 1031 |      | 1684512±78834a    | 1392400±157246b    | 1199253±42531b    | 0.004 |
| 56               | Benzyl alcohol                   | 100-51-6   | 1034 | 1045 | AADV | 3252497±1847742a  | 7717482±5168190a   | 11074733±1520219a | 0.070 |
| 57               | cis-Linalool oxide (furanoid)*   | 5989-33-3  | 1071 | 1064 | VT   | 6806606±183026a   | 5154254±192801b    | 4333389±229804c   | 0.000 |
| 58               | 1-Octanol                        | 111-87-5   | 1072 | 1068 | FADV | 1421472±59098a    | 1499777±115702a    | 1564331±62611a    | 0.190 |
| 59               | trans-Linalool oxide (furanoid)* | 34995-77-2 | 1087 | 1087 | VT   | 11633708±461899a  | 8748930±310685b    | 7356637±379121c   | 0.000 |
| 60               | Linalool*                        | 78-70-6    | 1102 | 1098 | VT   | 51622770±2601166a | 44142686±3478152b  | 40246694±1110780b | 0.005 |
| 61               | Hotrienol                        | 29957-43-5 | 1105 | 1108 | VT   | 8464733±419660a   | 8168068±1051234a   | 8705896±259738a   | 0.638 |
| 62               | Phenylethyl Alcohol              | 60-12-8    | 1111 | 1121 | AADV | 29285710±1739404a | 28603892±1868901a  | 27435221±2225251a | 0.539 |
| 63               | (Z)-3-Nonen-1-ol                 | 10340-23-5 | 1154 | 1156 |      | 167605±11468a     | 165627±25718a      | 184931±9776a      | 0.380 |
| 64               | cis-Linalol oxide (pyranoid)*    | 14009-71-3 | 1168 | 1173 | VT   | 1042967±70189a    | 909868±58601a      | 762209±56684b     | 0.004 |
| 65               | 1-Nonanol                        | 143-08-8   | 1172 | 1186 | FADV | 861614±24686a     | 810378±59477a      | 827536±65323a     | 0.521 |
| 66               | trans-Linalol oxide (pyranoid)*  | 39028-58-5 | 1168 | 1171 | VT   | 2515503±87601a    | 2488640±233195a    | 2131985±26710b    | 0.031 |
| 67               | 4-Terpinenol                     | 562-74-3   | 1174 | 1172 | VT   | 38231±4249a       | 33682±6419a        | 32429±1397a       | 0.323 |
| 68               | γ-Isogeraniol                    | 13066-51-8 | 1218 | 1222 | VT   | 694495±32837a     | 656186±59330a      | 672353±166117a    | 0.903 |
| 69               | Nerol                            | 106-25-2   | 1227 | 1229 | VT   | 1047911±65944a    | 886533±121827a     | 919345±85561a     | 0.165 |
| 70               | Geraniol*                        | 106-24-1   | 1256 | 1259 | VT   | 25769711±1090887a | 21431450±1657520b  | 19606191±471063b  | 0.002 |
| 71               | Nerolidol*                       | 40716-66-3 | 1563 | 1565 | VT   | 488503±72886a     | 361807±30178b      | 395544±22759ab    | 0.040 |
| 72               | Phytol                           | 150-86-7   | 2115 | 2116 |      | 27732±7796a       | 26763±5835a        | 24144±3967a       | 0.765 |
| <b>Aldehydes</b> |                                  |            |      |      |      |                   |                    |                   |       |
| 73               | 2-Methylpropanal                 | 78-84-2    | 533  | 537  | AADV | 1557107±1015817a  | 1431389±624624a    | 2729304±1363561a  | 0.316 |
| 74               | 3-Methylbutanal                  | 590-86-3   | 611  | 649  | AADV | 6569875±5107068a  | 6643096±4374612a   | 8104601±240058a   | 0.865 |
| 75               | 2-Methylbutanal                  | 96-17-3    | 625  | 646  | AADV | 14850268±9777461a | 16454979±10400634a | 19861537±765478a  | 0.759 |
| 76               | (E)-2-Butenal                    | 123-73-9   | 610  | 615  |      | 146155±41625a     | 1246082±112670b    | 1082990±71888b    | 0.000 |
| 77               | Pentanal                         | 110-62-3   | 674  | 698  | FADV | 4762169±624255a   | 5662566±1779847a   | 6317962±591540a   | 0.316 |

|     |                          |            |      |      |      |                   |                   |                   |       |
|-----|--------------------------|------------|------|------|------|-------------------|-------------------|-------------------|-------|
| 78  | 2-Methyl-2-butenal       | 1115-11-3  | 728  | 730  |      | 418154±72367a     | 361863±57492a     | 347124±31195a     | 0.333 |
| 79  | (E)-2-Pentenal           | 1576-87-0  | 740  | 754  | FADV | 875833±86954a     | 2252363±379855b   | 2113131±68104b    | 0.001 |
| 80  | 2-Methylpentanal         | 123-15-9   | 745  | 758  |      | 302624±30975a     | 211069±7622b      | 192307±3532b      | 0.001 |
| 81  | Hexanal*                 | 66-25-1    | 795  | 801  | FADV | 9100569±803361a   | 17689571±751896b  | 16983313±989890b  | 0.000 |
| 82  | (E)-2-Hexenal*           | 6728-26-3  | 841  | 850  | FADV | 11485375±3319958a | 24223696±1450802b | 27827075±993717b  | 0.000 |
| 83  | (Z)-4-Heptenal           | 6728-31-0  | 898  | 904  | FADV | 107774±13458a     | 142380±2715b      | 162360±14924b     | 0.004 |
| 84  | Heptanal                 | 111-71-7   | 900  | 903  | FADV | 8154933±71523a    | 8714515±272733a   | 9344194±358112b   | 0.004 |
| 85  | (E,E)-2,4-Hexadienal*    | 142-83-6   | 908  | 915  | FADV | 25725±14564a      | 118903±62068ab    | 205824±43728b     | 0.008 |
| 86  | (Z)-2-Heptenal           | 57266-86-1 | 954  | 958  | FADV | 790759±19360a     | 948708±42674b     | 1068360±47044c    | 0.000 |
| 87  | Benzaldehyde             | 100-52-7   | 955  | 961  | AADV | 24805558±899084a  | 26175437±2309837a | 26046351±1459430a | 0.568 |
| 88  | 2,4-Heptadienal          | 5910-85-0  | 995  | 1007 | FADV | 3044277±411930a   | 4192485±339107b   | 4103731±316573b   | 0.014 |
| 89  | Octanal*                 | 124-13-0   | 1002 | 1004 | FADV | 508426±20523a     | 597753±43687b     | 714702±14643c     | 0.000 |
| 90  | (E,E)-2,4-Heptadienal*   | 4313-03-5  | 1009 | 1002 | FADV | 6496582±512012a   | 7794333±558681b   | 8194534±469419b   | 0.016 |
| 91  | Phenylacetaldehyde*      | 122-78-1   | 1041 | 1051 | AADV | 56823231±2044326a | 66991480±1025440b | 68054420±3320279b | 0.002 |
| 92  | Melonal*                 | 106-72-9   | 1053 | 1044 |      | 97092±16613a      | 120797±1979a      | 152643±17645b     | 0.008 |
| 93  | (E)-2-Octenal*           | 2548-87-0  | 1057 | 1063 | FADV | 1559265±39619a    | 1843570±85621b    | 2142355±96235c    | 0.000 |
| 94  | (E,E)-2,4-Octadienal     | 30361-28-5 | 1109 | 1111 | FADV | 127651±6036a      | 132196±13234a     | 144056±8882a      | 0.190 |
| 95  | α-Cyclocitral            | 432-24-6   | 1114 | 1123 | CDV  | 212973±10244a     | 193063±13038a     | 202078±10374a     | 0.177 |
| 96  | (E)-2-Nonenal*           | 18829-56-6 | 1159 | 1162 | FADV | 208979±9964a      | 219917±10542a     | 260125±21139b     | 0.012 |
| 97  | 2,4-Dimethylbenzaldehyde | 15764-16-6 | 1171 | 1181 |      | 326760±7415a      | 307131±18876a     | 332756±19649a     | 0.212 |
| 98  | Safranal                 | 116-26-7   | 1196 | 1201 | CDV  | 722187±36118a     | 703980±45905a     | 701820±9517a      | 0.737 |
| 99  | Decanal                  | 112-31-2   | 1205 | 1205 | FADV | 568381±28238a     | 548891±29861a     | 640998±19928b     | 0.012 |
| 100 | 1-p-Menthen-9-al         | 29548-14-9 | 1214 | 1217 |      | 75039±3328a       | 78173±7239a       | 81945±5198a       | 0.367 |
| 101 | β-Cyclocitral            | 432-25-7   | 1217 | 1226 | CDV  | 2038359±82487a    | 2154588±158494a   | 2294881±30805a    | 0.064 |
| 102 | Neral                    | 106-26-3   | 1240 | 1242 | VT   | 88951±4489a       | 79587±6217a       | 90291±7851a       | 0.159 |
| 103 | β-Cyclohomocitral        | 472-66-2   | 1254 | 1251 | CDV  | 571796±30634a     | 611633±32245ab    | 640414±6585b      | 0.047 |
| 104 | (E)-2-Decenal            | 3913-81-3  | 1261 | 1250 |      | 151559±10150a     | 176071±11288a     | 202867±13350b     | 0.005 |
| 105 | Geranial                 | 141-27-5   | 1270 | 1279 | VT   | 1191126±35482a    | 1201364±136140a   | 1306873±40739a    | 0.256 |

|                |                                         |            |      |      |      |                       |                        |                       |       |
|----------------|-----------------------------------------|------------|------|------|------|-----------------------|------------------------|-----------------------|-------|
| 106            | $\alpha$ -Ethylidene-phenylacetaldehyde | 4411-89-6  | 1270 | 1284 |      | 253293 $\pm$ 7118a    | 241802 $\pm$ 24602a    | 268121 $\pm$ 13732a   | 0.236 |
| 107            | (2E,4Z)-Decadienal                      | 25152-83-4 | 1292 | 1312 | FADV | 114326 $\pm$ 15077a   | 138565 $\pm$ 5474ab    | 164699 $\pm$ 16353b   | 0.010 |
| 108            | (E,E)-2,4-Decadienal                    | 25152-84-5 | 1314 | 1312 | FADV | 209565 $\pm$ 31087a   | 268749 $\pm$ 21704ab   | 314146 $\pm$ 27444b   | 0.009 |
| 109            | 2-Undecenal                             | 2463-77-6  | 1363 | 1368 |      | 59504 $\pm$ 6230a     | 63783 $\pm$ 4335a      | 78554 $\pm$ 8102b     | 0.025 |
| <b>Ketones</b> |                                         |            |      |      |      |                       |                        |                       |       |
| 110            | 3-Methyl-2-butanone                     | 563-80-4   | 658  | 645  |      | 1717302 $\pm$ 691361a | 1296829 $\pm$ 1141386a | 978215 $\pm$ 66930a   | 0.536 |
| 111            | 1-Penten-3-one                          | 1629-58-9  | 659  | 678  | FADV | 356856 $\pm$ 24534a   | 301826 $\pm$ 8375a     | 329265 $\pm$ 40119a   | 0.223 |
| 112            | 3-Penten-2-one                          | 625-33-2   | 727  | 733  |      | 71464 $\pm$ 4617a     | 82762 $\pm$ 17806a     | 146189 $\pm$ 50246a   | 0.051 |
| 113            | 2-Methyl-3-pentanone                    | 565-69-5   | 735  | 742  |      | 63334 $\pm$ 5887a     | 58307 $\pm$ 3845a      | 58866 $\pm$ 2934a     | 0.372 |
| 114            | 2-Methyl-1-penten-3-one                 | 25044-01-3 | 755  | 748  |      | 66010 $\pm$ 3329a     | 61692 $\pm$ 2591a      | 51314 $\pm$ 463b      | 0.001 |
| 115            | 2,3-Hexanedione                         | 3848-24-6  | 774  | 786  |      | 214348 $\pm$ 45273a   | 268128 $\pm$ 19633a    | 265458 $\pm$ 7945a    | 0.108 |
| 116            | 2-Heptanone                             | 110-43-0   | 889  | 884  | FADV | 2418638 $\pm$ 125970a | 2631224 $\pm$ 196698a  | 2837011 $\pm$ 304036a | 0.147 |
| 117            | 1-Octen-3-one*                          | 4312-99-6  | 978  | 979  | FADV | 560822 $\pm$ 43623a   | 701995 $\pm$ 46764b    | 791889 $\pm$ 16814c   | 0.001 |
| 118            | 2,3-Octanedione                         | 585-25-1   | 985  | 987  |      | 1145000 $\pm$ 121236a | 1457002 $\pm$ 58751b   | 1662807 $\pm$ 8066c   | 0.001 |
| 119            | 3-Octanone                              | 106-68-3   | 986  | 984  |      | 356980 $\pm$ 12595a   | 437711 $\pm$ 43605b    | 439124 $\pm$ 28270b   | 0.027 |
| 120            | 6-Methyl-5-hepten-2-one                 | 110-93-0   | 987  | 985  | CDV  | 1486219 $\pm$ 91022a  | 1279058 $\pm$ 136207a  | 1315618 $\pm$ 103764a | 0.130 |
| 121            | 2,2,6-Trimethylcyclohexanone*           | 2408-37-9  | 1031 | 1023 | CDV  | 2440672 $\pm$ 29870a  | 2228902 $\pm$ 81284b   | 2369612 $\pm$ 6807a   | 0.006 |
| 122            | 3-Octen-2-one*                          | 1669-44-9  | 1039 | 1037 |      | 1156988 $\pm$ 132335a | 1614664 $\pm$ 130321b  | 1677405 $\pm$ 91054b  | 0.003 |
| 123            | $\gamma$ -Caprolactone                  | 695-06-7   | 1059 | 1056 | FADV | 172278 $\pm$ 13558a   | 278932 $\pm$ 65791a    | 375750 $\pm$ 159874a  | 0.119 |
| 124            | Ipsenone                                | 19860-68-5 | 1066 | 1083 | VT   | 90304 $\pm$ 28821a    | 60674 $\pm$ 23909a     | 190953 $\pm$ 46949b   | 0.009 |
| 125            | Isophorone                              | 78-59-1    | 1118 | 1126 | CDV  | 48006 $\pm$ 5622a     | 50446 $\pm$ 3257a      | 55158 $\pm$ 7634a     | 0.369 |
| 126            | 3-Nonen-2-one                           | 14309-57-0 | 1140 | 1136 |      | 153542 $\pm$ 13899a   | 166551 $\pm$ 15338a    | 199307 $\pm$ 5251b    | 0.010 |
| 127            | 5-Ethyl-6-methyl-3E-hepten-2-one        | 57283-79-1 | 1146 | 1144 |      | 1417613 $\pm$ 70830a  | 1587395 $\pm$ 165591a  | 1893314 $\pm$ 53429b  | 0.005 |
| 128            | 3-Methylacetophenone                    | 585-74-0   | 1181 | 1192 |      | 36047 $\pm$ 1392a     | 34034 $\pm$ 4961a      | 35467 $\pm$ 2299a     | 0.749 |
| 129            | $\beta$ -Damascenone*                   | 23726-93-4 | 1382 | 1388 | CDV  | 500084 $\pm$ 31353a   | 534153 $\pm$ 40448ab   | 591220 $\pm$ 34308b   | 0.048 |
| 130            | Pseudoionone                            | 1604-34-8  | 1405 | 1407 | CDV  | 22103 $\pm$ 2582a     | 22627 $\pm$ 1423a      | 26970 $\pm$ 1518b     | 0.039 |
| 131            | $\alpha$ -Ionone*                       | 127-41-3   | 1426 | 1429 | CDV  | 285101 $\pm$ 21431a   | 362749 $\pm$ 33931b    | 439720 $\pm$ 29115c   | 0.002 |
| 132            | Geranylacetone                          | 3796-70-1  | 1452 | 1445 | CDV  | 224779 $\pm$ 19186a   | 201611 $\pm$ 19881a    | 240363 $\pm$ 27156a   | 0.183 |

|               |                                         |            |      |      |           |                        |                        |                       |       |
|---------------|-----------------------------------------|------------|------|------|-----------|------------------------|------------------------|-----------------------|-------|
| 133           | $\beta$ -Ionone*                        | 14901-07-6 | 1484 | 1488 | CDV       | 752448 $\pm$ 38784a    | 906992 $\pm$ 35734b    | 1005997 $\pm$ 52380c  | 0.001 |
| 134           | Dihydroactinidiolide*                   | 17092-92-1 | 1523 | 1525 | CDV       | 93215 $\pm$ 3414a      | 121389 $\pm$ 3309b     | 126872 $\pm$ 4814b    | 0.000 |
| <b>Esters</b> |                                         |            |      |      |           |                        |                        |                       |       |
| 135           | Pentyl formate                          | 638-49-3   | 823  | 827  |           | 259127 $\pm$ 66505a    | 501681 $\pm$ 12003b    | 525623 $\pm$ 48440b   | 0.001 |
| 136           | Methyl caproate                         | 106-70-7   | 925  | 938  | FADV      | 474851 $\pm$ 48950a    | 454970 $\pm$ 28470a    | 458212 $\pm$ 17180a   | 0.757 |
| 137           | Hexyl formate                           | 629-33-4   | 928  | 927  | FADV      | 109160 $\pm$ 3118a     | 135800 $\pm$ 10475b    | 163402 $\pm$ 13730c   | 0.002 |
| 138           | 3-Methyl-4-penten-1-ol acetate          | 71487-16-6 | 1008 | 1006 |           | 657143 $\pm$ 64274a    | 537279 $\pm$ 97966ab   | 418209 $\pm$ 86961b   | 0.037 |
| 139           | Benzyl formate                          | 104-57-4   | 1075 | 1082 | AADV      | 96363 $\pm$ 5282a      | 123776 $\pm$ 21600a    | 94294 $\pm$ 9840a     | 0.075 |
| 140           | (Z)-3-Hexenyl isobutanoate              | 41519-23-7 | 1145 | 1143 | FADV      | 134511 $\pm$ 4709a     | 140098 $\pm$ 14815a    | 155284 $\pm$ 1772a    | 0.071 |
| 141           | (E)-3-Hexenyl butanoate                 | 53398-84-8 | 1187 | 1186 | FADV      | 1948656 $\pm$ 81477a   | 1912644 $\pm$ 208818a  | 2085532 $\pm$ 72931a  | 0.329 |
| 142           | Methyl salicylate*                      | 119-36-8   | 1191 | 1199 | AADV      | 11328008 $\pm$ 152147a | 9740791 $\pm$ 605279b  | 9029901 $\pm$ 436991b | 0.002 |
| 143           | Hexyl butyrate                          | 2639-63-6  | 1193 | 1184 | FADV      | 143198 $\pm$ 6854a     | 145781 $\pm$ 10547a    | 165555 $\pm$ 14466a   | 0.091 |
| 144           | (E)-2-Hexenyl butanoate                 | 53398-83-7 | 1196 | 1195 | FADV      | 654350 $\pm$ 16433ab   | 574413 $\pm$ 66504a    | 676202 $\pm$ 10782b   | 0.046 |
| 145           | (Z)-3-Hexenyl- $\alpha$ -methylbutyrate | 53398-85-9 | 1233 | 1233 | FADV/AADV | 3204437 $\pm$ 160701a  | 3595800 $\pm$ 284190ab | 4046202 $\pm$ 120078b | 0.006 |
| 146           | (Z)-3-Hexenyl isovalerate*              | 35154-45-1 | 1237 | 1245 | FADV/AADV | 605793 $\pm$ 17831a    | 695421 $\pm$ 58578ab   | 728231 $\pm$ 32280b   | 0.023 |
| 147           | Hexyl 2-methylbutyrate                  | 10032-15-2 | 1238 | 1227 | FADV/AADV | 324285 $\pm$ 18970a    | 330497 $\pm$ 22082a    | 395996 $\pm$ 5029b    | 0.004 |
| 148           | (E)-2-Hexenyl isovalerate               | 68698-59-9 | 1240 | 1245 | FADV/AADV | 412003 $\pm$ 23496a    | 383539 $\pm$ 55677a    | 470344 $\pm$ 17304a   | 0.065 |
| 149           | (Z)-2-Hexenyl isovalerate               |            | 1246 | 1245 | FADV/AADV | 107795 $\pm$ 6319a     | 102149 $\pm$ 13305a    | 142505 $\pm$ 7213b    | 0.004 |
| 150           | $\beta$ -Octalactone*                   | 698-76-0   | 1283 | 1288 |           | 31772 $\pm$ 5297a      | 36088 $\pm$ 6604ab     | 46619 $\pm$ 4554b     | 0.041 |
| 151           | Pentyl hexanoate                        | 540-07-8   | 1289 | 1288 | FADV      | 55020 $\pm$ 596a       | 60678 $\pm$ 4689a      | 70004 $\pm$ 3663b     | 0.005 |
| 152           | Methyl geranate                         | 1189-09-9  | 1324 | 1321 | VT        | 219693 $\pm$ 14783a    | 179694 $\pm$ 20308a    | 209242 $\pm$ 16000a   | 0.068 |
| 153           | cis-3-Hexenyl hexanoate*                | 31501-11-8 | 1382 | 1380 | FADV      | 4791843 $\pm$ 95104a   | 4599033 $\pm$ 450493a  | 5660186 $\pm$ 326154b | 0.015 |
| 154           | Hexyl hexanoate*                        | 6378-65-0  | 1387 | 1385 | FADV      | 320920 $\pm$ 12899a    | 338163 $\pm$ 22918a    | 387174 $\pm$ 21543b   | 0.015 |
| 155           | (E)-2-Hexenyl hexanoate                 | 53398-86-0 | 1390 | 1391 | FADV      | 340337 $\pm$ 11048ab   | 297972 $\pm$ 35746a    | 382884 $\pm$ 23705b   | 0.019 |
| 156           | cis-3-Hexenyl trans-2-hexenoate         | 53398-87-1 | 1433 | 1401 | FADV      | 23334 $\pm$ 1702ab     | 20405 $\pm$ 2060a      | 25984 $\pm$ 2430b     | 0.046 |
| 157           | (Z)-3-Hexenyl benzoate                  | 25152-85-6 | 1568 | 1565 | FADV/AADV | 94765 $\pm$ 7121ab     | 86667 $\pm$ 4655a      | 114608 $\pm$ 12901b   | 0.022 |
| 158           | (E)-2-Hexenyl benzoate                  | 76841-70-8 | 1583 | 1590 | FADV/AADV | 25787 $\pm$ 2998a      | 23440 $\pm$ 1803a      | 32423 $\pm$ 5175a     | 0.053 |

#### Acids

|                                      |                                      |            |      |      |      |                   |                   |                  |       |
|--------------------------------------|--------------------------------------|------------|------|------|------|-------------------|-------------------|------------------|-------|
| 159                                  | 2-Methylbutyric acid                 | 116-53-0   | 877  | 894  | AADV | 15057±968a        | 22835±4415ab      | 29001±7818b      | 0.046 |
| 160                                  | Hexanoic acid                        | 142-62-1   | 1005 | 1013 | FADV | 5978366±1431306ab | 2721934±277423a   | 9319470±3742702b | 0.036 |
| 161                                  | (E)-3-Hexenoic acid                  | 1577-18-0  | 1023 | 1021 | FADV | 283771±5298a      | 680949±136019b    | 837363±131156b   | 0.002 |
| 162                                  | (E)-2-Hexenoic acid                  | 13419-69-7 | 1045 | 1041 | FADV | 22536±6206a       | 35017±21290a      | 35847±11458a     | 0.491 |
| 163                                  | Levulinic acid                       | 123-76-2   | 1060 | 1063 |      | 182445±39815a     | 302460±111112a    | 247356±52166a    | 0.223 |
| 164                                  | Nonanoic acid                        | 112-05-0   | 1276 | 1281 | FADV | 1070712±204888a   | 1053283±155982a   | 1078096±323599a  | 0.992 |
| 165                                  | trans-Geranic acid                   | 4698-08-2  | 1356 | 1355 | VT   | 466567±196526a    | 465080±57513a     | 515235±99031a    | 0.871 |
| <b>Oxygen heterocyclic compounds</b> |                                      |            |      |      |      |                   |                   |                  |       |
| 166                                  | 2-Methylfuran                        | 534-22-5   | 569  | 590  |      | 30492±13922a      | 39746±4203a       | 70866±15315b     | 0.016 |
| 167                                  | 2-Ethyl-furan                        | 3208-16-0  | 679  | 702  |      | 12912661±1931188a | 19559460±1393131b | 20008958±417828b | 0.001 |
| 168                                  | 2-Butylfuran                         | 4466-24-4  | 888  | 889  |      | 1465334±94862a    | 1528276±102703a   | 1965421±141570b  | 0.003 |
| 169                                  | Pentyl-oxirane                       | 5063-65-0  | 903  | 905  |      | 535872±24469a     | 352430±132486a    | 456470±106758a   | 0.156 |
| 170                                  | (Z)-2-(2-Pentenyl)furan              | 70424-13-4 | 1000 | 1001 |      | 490464±6621a      | 571532±41344b     | 620708±8880b     | 0.002 |
| 171                                  | 2-Methyl-2-cyclohexylbutane          | 31797-64-5 | 1152 | 1130 |      | 160457±6909a      | 162754±10318a     | 184146±11602a    | 0.047 |
| 172                                  | Theaspirane isomer1                  | 36431-72-8 | 1294 | 1305 | CDV  | 488258±23286a     | 506516±29833a     | 568110±2267b     | 0.010 |
| 173                                  | Theaspirane isomer2                  | 36431-72-8 | 1312 | 1305 | CDV  | 470615±26019a     | 488685±26027a     | 542935±8385b     | 0.016 |
| <b>Sulfur compounds</b>              |                                      |            |      |      |      |                   |                   |                  |       |
| 174                                  | Dimethyl sulfide                     | 75-18-3    | 518  | 532  | AADV | 2799808±2469068a  | 4020864±343221a   | 4911749±1902674a | 0.413 |
| 175                                  | Dimethyl trisulfide                  | 3658-80-8  | 962  | 972  | AADV | 86971±2348a       | 69468±13024a      | 70381±9858a      | 0.113 |
| <b>Nitrogen compounds</b>            |                                      |            |      |      |      |                   |                   |                  |       |
| 176                                  | 1-Ethyl-1H-pyrrole-2-carboxaldehyde* | 2167-14-8  | 1046 | 1046 |      | 66322±4049a       | 75465±3374a       | 95074±6856b      | 0.001 |
| <b>Other compounds</b>               |                                      |            |      |      |      |                   |                   |                  |       |
| 177                                  | Benzyl nitrile                       | 140-29-4   | 1137 | 1143 |      | 242611±6819a      | 222717±16161ab    | 207489±9159b     | 0.026 |
| 178                                  | 4-sec-Butylphenol                    | 99-71-8    | 1314 | 1315 |      | 32152±2180a       | 33346±3014a       | 40919±2638b      | 0.013 |
| 179                                  | Caffeine                             | 58-08-2    | 1846 | 1841 |      | 424826±182534a    | 624819±120658a    | 413377±98904a    | 0.191 |

Note: The data was shown as mean ± SD with peak area (n=3); \*: the compound was confirmed by the authentic standard; a, b, c:  $P < 0.05$  for the changes with different letters (Tukey s-b (K) test).

**Table S2.** The fold changes (FC) and *P*-values of differential volatile compounds in the R1 vs R1.5 group

|                                     | <b>R1</b> | <b>R1.5</b> | <b>FC</b> | <b><i>P</i>-values</b> |
|-------------------------------------|-----------|-------------|-----------|------------------------|
| (E)-2-Butenal                       | 146155    | 1246082     | 8.53      | 0.000                  |
| Toluene                             | 2816410   | 10756413    | 3.82      | 0.000                  |
| (E)-2-Pentenal                      | 875833    | 2252363     | 2.57      | 0.004                  |
| (E)-3-Hexenoic acid                 | 283771    | 680949      | 2.40      | 0.007                  |
| m-Xylene                            | 699665    | 1666336     | 2.38      | 0.003                  |
| p-Xylene                            | 682294    | 1552080     | 2.27      | 0.048                  |
| o-Xylene                            | 1484518   | 3271697     | 2.20      | 0.034                  |
| (E)-2-Hexenal                       | 11485375  | 24223696    | 2.11      | 0.004                  |
| Hexanal                             | 9100569   | 17689571    | 1.94      | 0.000                  |
| Pentyl formate                      | 259127    | 501681      | 1.94      | 0.003                  |
| 1,2,4,5-Tetramethylbenzene          | 126973    | 226179      | 1.78      | 0.006                  |
| 2-Methylbutyric acid                | 15057     | 22835       | 1.52      | 0.041                  |
| 2-Ethyl-furan                       | 12912661  | 19559460    | 1.51      | 0.008                  |
| 3-Octen-2-one                       | 1156988   | 1614664     | 1.40      | 0.013                  |
| 2,4-Heptadienal                     | 3044277   | 4192485     | 1.38      | 0.020                  |
| (Z)-4-Heptenal                      | 107774    | 142380      | 1.32      | 0.012                  |
| Dihydroactinidiolide                | 93215     | 121389      | 1.30      | 0.001                  |
| 4-Carene                            | 25681     | 32874       | 1.28      | 0.009                  |
| 2,3-Octanedione                     | 1145000   | 1457002     | 1.27      | 0.016                  |
| $\alpha$ -Ionone                    | 285101    | 362749      | 1.27      | 0.029                  |
| $\beta$ -Farnesene                  | 36568     | 45829       | 1.25      | 0.004                  |
| 1-Octen-3-one                       | 560822    | 701995      | 1.25      | 0.019                  |
| Hexyl formate                       | 109160    | 135800      | 1.24      | 0.013                  |
| 3-Octanone                          | 356980    | 437711      | 1.23      | 0.037                  |
| $\beta$ -Ionone                     | 752448    | 906992      | 1.21      | 0.007                  |
| (E,E)-2,4-Heptadienal               | 6496582   | 7794333     | 1.20      | 0.041                  |
| (Z)-2-Heptenal                      | 790759    | 948708      | 1.20      | 0.004                  |
| 1-Octen-3-ol                        | 4241123   | 5071255     | 1.20      | 0.020                  |
| (E)-2-Octenal                       | 1559265   | 1843570     | 1.18      | 0.006                  |
| Phenylacetaldehyde                  | 56823231  | 66991480    | 1.18      | 0.002                  |
| Octanal                             | 508426    | 597753      | 1.18      | 0.033                  |
| (Z)-2-(2-Pentenyl)furan             | 490464    | 571532      | 1.17      | 0.028                  |
| (E)-2-Decenal                       | 151559    | 176071      | 1.16      | 0.049                  |
| 1-Ethyl-1H-pyrrole-2-carboxaldehyde | 66322     | 75465       | 1.14      | 0.040                  |
| Heptanal                            | 8154933   | 8714515     | 1.07      | 0.026                  |
| 2,2,6-Trimethylcyclohexanone        | 2440672   | 2228902     | 0.91      | 0.013                  |
| Methyl salicylate                   | 11328008  | 9740791     | 0.86      | 0.012                  |
| Linalool                            | 51622770  | 44142686    | 0.86      | 0.041                  |
| Geraniol                            | 25769711  | 21431450    | 0.83      | 0.019                  |
| 2-Ethyl-1-hexanol                   | 1684512   | 1392400     | 0.83      | 0.045                  |

|                                 |          |         |      |       |
|---------------------------------|----------|---------|------|-------|
| cis-Linalool oxide (furanoid)   | 6806606  | 5154254 | 0.76 | 0.000 |
| trans-Linalool oxide (furanoid) | 11633708 | 8748930 | 0.75 | 0.001 |
| 2-Methylpentanal                | 302624   | 211069  | 0.70 | 0.008 |
| Isocitronellene                 | 123238   | 79885   | 0.65 | 0.011 |
| 1-Hexanol                       | 9765593  | 5994946 | 0.61 | 0.000 |
| Hexanoic acid                   | 5978366  | 2721934 | 0.46 | 0.018 |

Note: The difference significances were calculated by ANOVA.

**Table S3.** The fold changes (FC) and *P*-values of differential volatile compounds in the R1 vs RR1.5 group

|                                     | <b>R1</b> | <b>RR1.5</b> | <b>FC</b> | <b><i>P</i>-values</b> |
|-------------------------------------|-----------|--------------|-----------|------------------------|
| (E,E)-2,4-Hexadienal                | 25725     | 205824       | 8.00      | 0.002                  |
| (E)-2-Butenal                       | 146155    | 1082990      | 7.41      | 0.000                  |
| (E)-3-Hexenoic acid                 | 283771    | 837363       | 2.95      | 0.002                  |
| (E)-2-Hexenal                       | 11485375  | 27827075     | 2.42      | 0.001                  |
| (E)-2-Pentenal                      | 875833    | 2113131      | 2.41      | 0.000                  |
| 2-Methylfuran                       | 30492     | 70866        | 2.32      | 0.028                  |
| Toluene                             | 2816410   | 6099123      | 2.17      | 0.005                  |
| Ipsenone                            | 90304     | 190953       | 2.11      | 0.034                  |
| Pentyl formate                      | 259127    | 525623       | 2.03      | 0.005                  |
| 2-Methylbutyric acid                | 15057     | 29001        | 1.93      | 0.037                  |
| Hexanal                             | 9100569   | 16983313     | 1.87      | 0.000                  |
| Melonal                             | 97092     | 152643       | 1.57      | 0.017                  |
| 2-Ethyl-furan                       | 12912661  | 20008958     | 1.55      | 0.003                  |
| $\alpha$ -Ionone                    | 285101    | 439720       | 1.54      | 0.002                  |
| $\beta$ -Farnesene                  | 36568     | 56132        | 1.53      | 0.009                  |
| (Z)-4-Heptenal                      | 107774    | 162360       | 1.51      | 0.009                  |
| (E,E)-2,4-Decadienal                | 209565    | 314146       | 1.50      | 0.012                  |
| Hexyl formate                       | 109160    | 163402       | 1.50      | 0.003                  |
| $\beta$ -Octalactone                | 31772     | 46619        | 1.47      | 0.021                  |
| 2,3-Octanedione                     | 1145000   | 1662807      | 1.45      | 0.002                  |
| 3-Octen-2-one                       | 1156988   | 1677405      | 1.45      | 0.005                  |
| (2E,4Z)-Decadienal                  | 114326    | 164699       | 1.44      | 0.017                  |
| 1-Ethyl-1H-pyrrole-2-carboxaldehyde | 66322     | 95074        | 1.43      | 0.003                  |
| 1-Octen-3-one                       | 560822    | 791889       | 1.41      | 0.001                  |
| Octanal                             | 508426    | 714702       | 1.41      | 0.000                  |
| (E)-2-Octenal                       | 1559265   | 2142355      | 1.37      | 0.001                  |
| Dihydroactinidiolide                | 93215     | 126872       | 1.36      | 0.001                  |
| (Z)-2-Heptenal                      | 790759    | 1068360      | 1.35      | 0.001                  |
| 2,4-Heptadienal                     | 3044277   | 4103731      | 1.35      | 0.024                  |
| 2-Butylfuran                        | 1465334   | 1965421      | 1.34      | 0.007                  |
| (E)-2-Decenal                       | 151559    | 202867       | 1.34      | 0.006                  |
| $\beta$ -Ionone                     | 752448    | 1005997      | 1.34      | 0.003                  |

|                                         |          |          |      |       |
|-----------------------------------------|----------|----------|------|-------|
| 5-Ethyl-6-methyl-3E-hepten-2-one        | 1417613  | 1893314  | 1.34 | 0.001 |
| Pentanal                                | 4762169  | 6317962  | 1.33 | 0.035 |
| (Z)-2-Hexenyl isovalerate               | 107795   | 142505   | 1.32 | 0.003 |
| 2-Undecenal                             | 59504    | 78554    | 1.32 | 0.032 |
| 4,8-Dimethyl-1,3,7-nonadiene            | 138444   | 180711   | 1.31 | 0.013 |
| 3-Nonen-2-one                           | 153542   | 199307   | 1.30 | 0.006 |
| 4-sec-Butylphenol                       | 32152    | 40919    | 1.27 | 0.010 |
| Pentyl hexanoate                        | 55020    | 70004    | 1.27 | 0.002 |
| (Z)-2-(2-Pentenyl)furan                 | 490464   | 620708   | 1.27 | 0.000 |
| (Z)-3-Hexenyl- $\alpha$ -methylbutyrate | 3204437  | 4046202  | 1.26 | 0.002 |
| (E,E)-2,4-Heptadienal                   | 6496582  | 8194534  | 1.26 | 0.013 |
| (E)- $\beta$ -Ocimene                   | 264748   | 333873   | 1.26 | 0.004 |
| $\beta$ -Ocimene                        | 2471437  | 3088188  | 1.25 | 0.008 |
| (E)-2-Nonenal                           | 208979   | 260125   | 1.24 | 0.019 |
| 3-Octanone                              | 356980   | 439124   | 1.23 | 0.010 |
| 4-Carene                                | 25681    | 31415    | 1.22 | 0.015 |
| Hexyl 2-methylbutyrate                  | 324285   | 395996   | 1.22 | 0.003 |
| Pseudoionone                            | 22103    | 26970    | 1.22 | 0.048 |
| (4E,6E)-Allocimene                      | 199404   | 243094   | 1.22 | 0.045 |
| 1-Octen-3-ol                            | 4241123  | 5165420  | 1.22 | 0.018 |
| $\alpha$ -Cubebene                      | 106810   | 129116   | 1.21 | 0.030 |
| $\delta$ -Cadinene                      | 300089   | 362303   | 1.21 | 0.004 |
| Hexyl hexanoate                         | 320920   | 387174   | 1.21 | 0.010 |
| (Z)-3-Hexenyl isovalerate               | 605793   | 728231   | 1.20 | 0.005 |
| Phenylacetaldehyde                      | 56823231 | 68054420 | 1.20 | 0.008 |
| $\alpha$ -Terpinene                     | 90403    | 108061   | 1.20 | 0.030 |
| $\beta$ -Damascenone                    | 500084   | 592318   | 1.18 | 0.025 |
| 2,6-Dimethyl-1,5-heptadiene             | 45968    | 54445    | 1.18 | 0.026 |
| cis-3-Hexenyl hexanoate                 | 4791843  | 5660186  | 1.18 | 0.011 |
| allo-Ocimene                            | 275826   | 322809   | 1.17 | 0.008 |
| Theaspirane isomer1                     | 488258   | 568110   | 1.16 | 0.004 |
| Humulene                                | 108653   | 126050   | 1.16 | 0.006 |
| 1,3,8-p-Menthatriene                    | 71978    | 83192    | 1.16 | 0.030 |
| (Z)-3-Hexenyl isobutanoate              | 134511   | 155284   | 1.15 | 0.002 |
| Theaspirane isomer2                     | 470615   | 542935   | 1.15 | 0.010 |
| 2-Methyl-2-cyclohexylbutane             | 160457   | 184146   | 1.15 | 0.038 |
| Heptanal                                | 8154933  | 9344194  | 1.15 | 0.005 |
| $\alpha$ -Muurolene                     | 65453    | 74723    | 1.14 | 0.002 |
| (E)-2-Hexenyl isovalerate               | 412003   | 470344   | 1.14 | 0.026 |
| Limonene                                | 6015561  | 6824900  | 1.13 | 0.015 |
| Decanal                                 | 568381   | 640998   | 1.13 | 0.022 |
| $\beta$ -Cyclocitral                    | 2038359  | 2294881  | 1.13 | 0.007 |
| (E)-2-Hexenyl hexanoate                 | 340337   | 382884   | 1.13 | 0.048 |

|                                 |          |          |      |       |
|---------------------------------|----------|----------|------|-------|
| Calamenene                      | 874274   | 981115   | 1.12 | 0.026 |
| $\alpha$ -Fellandrene           | 1155623  | 1295110  | 1.12 | 0.046 |
| $\beta$ -Cyclohomocitral        | 571796   | 640414   | 1.12 | 0.019 |
| 1-Octanol                       | 1421472  | 1564331  | 1.10 | 0.045 |
| Geranial                        | 1191126  | 1306873  | 1.10 | 0.021 |
| 2,2,6-Trimethylcyclohexanone    | 2440672  | 2369612  | 0.97 | 0.016 |
| 1,2,4,5-Tetramethylbenzene      | 126973   | 114747   | 0.90 | 0.002 |
| m-Cymenene                      | 353720   | 311105   | 0.88 | 0.005 |
| Benzyl nitrile                  | 242611   | 207489   | 0.86 | 0.006 |
| trans-Linalol oxide (pyranoid)  | 2515503  | 2131985  | 0.85 | 0.002 |
| 5-Ethyl-1-formylcyclopentene    | 149667   | 123917   | 0.83 | 0.012 |
| Dimethyl trisulfide             | 86971    | 70381    | 0.81 | 0.047 |
| Methyl salicylate               | 11328008 | 9029901  | 0.80 | 0.001 |
| Linalool                        | 51622770 | 40246694 | 0.78 | 0.002 |
| 2-Methyl-1-penten-3-one         | 66010    | 51314    | 0.78 | 0.002 |
| Isocitronellene                 | 123238   | 94438    | 0.77 | 0.043 |
| Geraniol                        | 25769711 | 19606191 | 0.76 | 0.001 |
| 2-Methylnaphthalene             | 11646    | 8640     | 0.74 | 0.015 |
| cis-Linalol oxide (pyranoid)    | 1042967  | 762209   | 0.73 | 0.006 |
| Butylated Hydroxytoluene        | 74164    | 53082    | 0.72 | 0.011 |
| 2-Ethyl-1-hexanol               | 1684512  | 1199253  | 0.71 | 0.001 |
| cis-Linalool oxide (furanoid)   | 6806606  | 4333389  | 0.64 | 0.000 |
| 3-Methyl-4-penten-1-ol acetate  | 657143   | 418209   | 0.64 | 0.019 |
| 2-Methylpentanal                | 302624   | 192307   | 0.64 | 0.004 |
| trans-Linalool oxide (furanoid) | 11633708 | 7356637  | 0.63 | 0.000 |
| Dodecane                        | 571422   | 332790   | 0.58 | 0.005 |
| (Z)-3-Hexenol                   | 11115041 | 6195826  | 0.56 | 0.012 |
| (Z)-2-pentenol                  | 2114798  | 1169151  | 0.55 | 0.034 |
| 1-Hexanol                       | 9765593  | 4794893  | 0.49 | 0.000 |
| 3-Methyl-1-butanol              | 57719    | 21433    | 0.37 | 0.006 |

Note: The difference significances were calculated by ANOVA.

**Table S4.** The fold changes (FC) and *P*-values of differential volatile compounds in the R1.5 vs RR1.5 group

|                           | <b>R1.5</b> | <b>RR1.5</b> | <b>FC</b> | <b><i>P</i>-values</b> |
|---------------------------|-------------|--------------|-----------|------------------------|
| Hexanoic acid             | 2721934     | 9319470      | 3.42      | 0.038                  |
| 4-Methyl-1,3-pentadiene   | 27340       | 87358        | 3.20      | 0.029                  |
| Ipsenone                  | 60674       | 190953       | 3.15      | 0.013                  |
| 2-Methylfuran             | 39746       | 70866        | 1.78      | 0.027                  |
| (Z)-2-Hexenyl isovalerate | 102149      | 142505       | 1.40      | 0.010                  |
| (E)-2-Hexenyl benzoate    | 23440       | 32423        | 1.38      | 0.047                  |
| (Z)-3-Hexenyl benzoate    | 86667       | 114608       | 1.32      | 0.024                  |
| 2-Butylfuran              | 1528276     | 1965421      | 1.29      | 0.012                  |

|                                     |          |          |      |       |
|-------------------------------------|----------|----------|------|-------|
| (E)-2-Hexenyl hexanoate             | 297972   | 382884   | 1.28 | 0.027 |
| cis-3-Hexenyl trans-2-hexenoate     | 20405    | 25984    | 1.27 | 0.039 |
| Melonal                             | 120797   | 152643   | 1.26 | 0.036 |
| 1-Ethyl-1H-pyrrole-2-carboxaldehyde | 75465    | 95074    | 1.26 | 0.011 |
| Cubenene                            | 18042    | 22318    | 1.24 | 0.042 |
| cis-3-Hexenyl hexanoate             | 4599033  | 5660186  | 1.23 | 0.030 |
| 4-sec-Butylphenol                   | 33346    | 40919    | 1.23 | 0.031 |
| $\alpha$ -Ionone                    | 362749   | 439720   | 1.21 | 0.041 |
| Hexyl 2-methylbutyrate              | 330497   | 395996   | 1.20 | 0.007 |
| 3-Nonen-2-one                       | 166551   | 199307   | 1.20 | 0.025 |
| Octanal                             | 597753   | 714702   | 1.20 | 0.012 |
| 5-Ethyl-6-methyl-3E-hepten-2-one    | 1587395  | 1893314  | 1.19 | 0.038 |
| Pseudoionone                        | 22627    | 26970    | 1.19 | 0.022 |
| (E)-2-Nonenal                       | 219917   | 260125   | 1.18 | 0.042 |
| Isocitronellene                     | 79885    | 94438    | 1.18 | 0.045 |
| Decanal                             | 548891   | 640998   | 1.17 | 0.011 |
| (E)-2-Octenal                       | 1843570  | 2142355  | 1.16 | 0.016 |
| (E)-2-Hexenal                       | 24223696 | 27827075 | 1.15 | 0.024 |
| 2,3-Octanedione                     | 1457002  | 1662807  | 1.14 | 0.004 |
| 1-Octen-3-one                       | 701995   | 791889   | 1.13 | 0.035 |
| (Z)-2-Heptenal                      | 948708   | 1068360  | 1.13 | 0.031 |
| Theaspirane isomer1                 | 506516   | 568110   | 1.12 | 0.023 |
| Theaspirane isomer2                 | 488685   | 542935   | 1.11 | 0.026 |
| 2,2,6-Trimethylcyclohexanone        | 2228902  | 2369612  | 1.06 | 0.040 |
| 2-Methylpentanal                    | 211069   | 192307   | 0.91 | 0.018 |
| trans-Linalool oxide (furanoid)     | 8748930  | 7356637  | 0.84 | 0.008 |
| cis-Linalool oxide (furanoid)       | 5154254  | 4333389  | 0.84 | 0.009 |
| cis-Linalol oxide (pyranoid)        | 909868   | 762209   | 0.84 | 0.035 |
| 2-Methyl-1-penten-3-one             | 61692    | 51314    | 0.83 | 0.002 |
| 2-Methylnaphthalene                 | 10763    | 8640     | 0.80 | 0.003 |
| 1-Hexanol                           | 5994946  | 4794893  | 0.80 | 0.013 |
| (Z)-3-Hexenol                       | 8145185  | 6195826  | 0.76 | 0.040 |
| (Z)-2-Pentenol                      | 1772285  | 1169151  | 0.66 | 0.012 |
| Dodecane                            | 516537   | 332790   | 0.64 | 0.006 |
| Toluene                             | 10756413 | 6099123  | 0.57 | 0.001 |
| 1,2,4,5-Tetramethylbenzene          | 226179   | 114747   | 0.51 | 0.004 |
| o-Xylene                            | 3271697  | 1616801  | 0.49 | 0.001 |
| 3-Methyl-1-butanol                  | 43794    | 21433    | 0.49 | 0.008 |
| p-Xylene                            | 1552080  | 648676   | 0.42 | 0.000 |
| m-Xylene                            | 1666336  | 687241   | 0.41 | 0.000 |

Note: The difference significances were calculated by ANOVA.
